# Supplementary material for: Grain boundary dominated ion migration in polycrystalline organic–inorganic halide perovskite films
Source: Royal Society of Chemistry journal article supplement (doi:10.1039/c6ee00413j), 2016-01-01
Supplement: c6ee00413j1.pdf [file c6ee00413j1.pdf]

**Supplementary Information for**  
**Grain Boundary Dominated Current Hysteresis and Ion Migration in**  
**Polycrystalline Perovskite Solar Cells**

Yuchuan Shao<sup>1†</sup>, Yanjun Fang<sup>1†</sup>, Tao Li<sup>2†</sup>, Qi Wang<sup>1†</sup>, Qingfeng Dong<sup>1</sup>, Yehao Deng<sup>1</sup>, Yongbo Yuan<sup>1</sup>, Haotong Wei<sup>1</sup>, Meiyu Wang<sup>1</sup>, Alexei Gruverman<sup>2</sup>, Jeffery Shield<sup>1</sup> and Jinsong Huang<sup>1\*</sup>

<sup>1</sup>*Department of Mechanical and Materials Engineering, University of Nebraska-Lincoln,  
Lincoln, Nebraska 68588, USA.*

<sup>2</sup>*Department of Physics and Astronomy, University of Nebraska-Lincoln, Lincoln, Nebraska  
68588, USA*

---

\* Correspondence should go to J.H. at e-mail: [jhuang2@unl.edu](mailto:jhuang2@unl.edu)

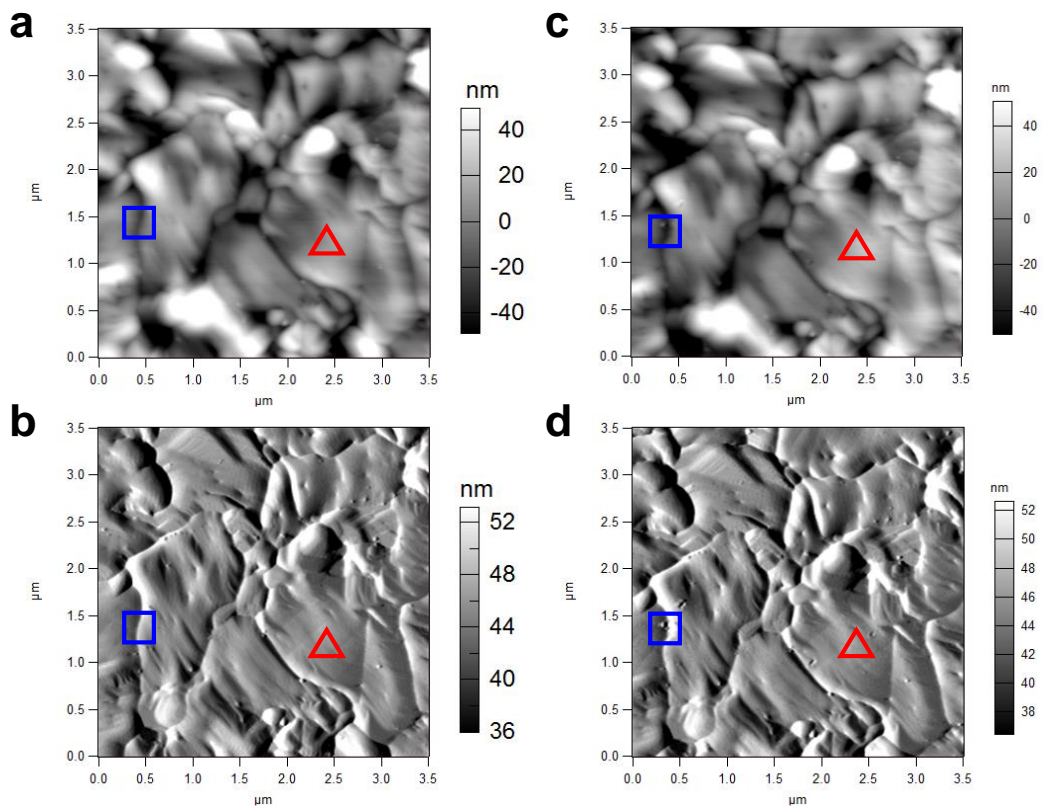

**Supplementary Figure 1:** (a) Height and (b) deflection images of the perovskite sample before the  $I$ - $V$  measurement. (c) Height and (d) deflection images of the same area after the  $I$ - $V$  measurement. The blue squares and red triangles indicate where the  $I$ - $V$  measurements were performed at grain boundary and grain interior, respectively.

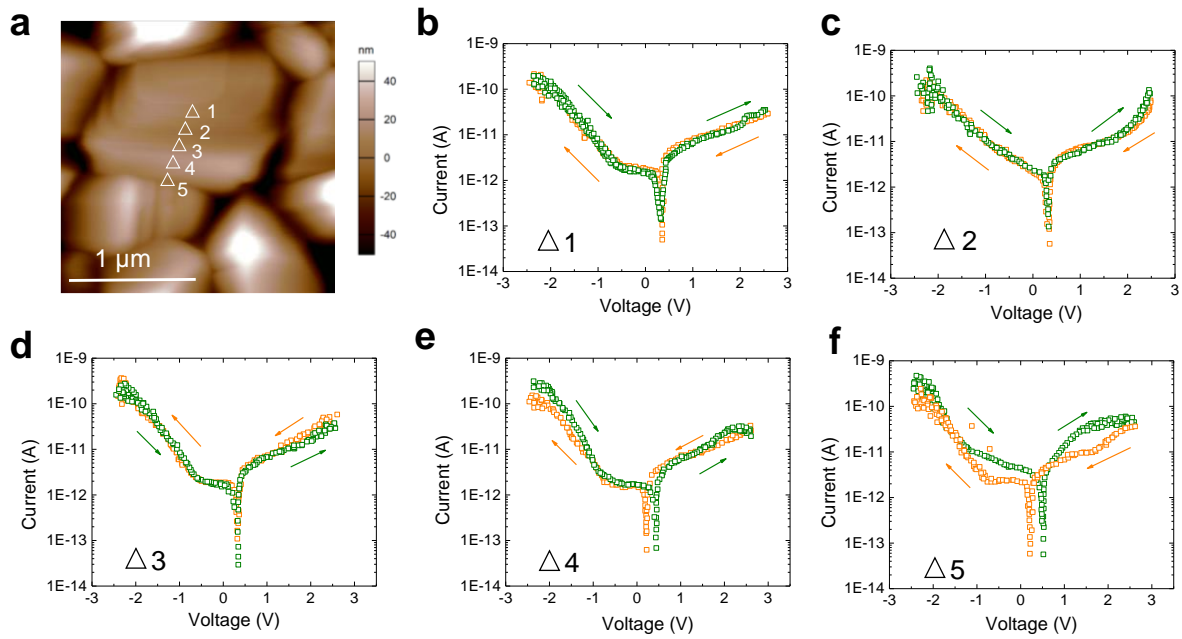

**Supplementary Figure 2:** (a) Topography AFM image of the perovskite thin film. Five locations where c-AFM tip was placed at to measure dark current are labeled with white triangles. (b)-(f) Dark curves measured at various points with an interval of  $\sim 100$  nm in the direction from the center of a grain to the grain boundary ( $\Delta 1$ -  $\Delta 5$  points as shown in the Supplementary Figure 2 (a)).

The results show that the dark-current hysteresis only appeared when the c-AFM tip placed with a range about 100 nm ( $\Delta 4$  point) from the grain boundary for the 500-nm-thick perovskite film. This support our scenario that grain boundaries dominates the ion migration.

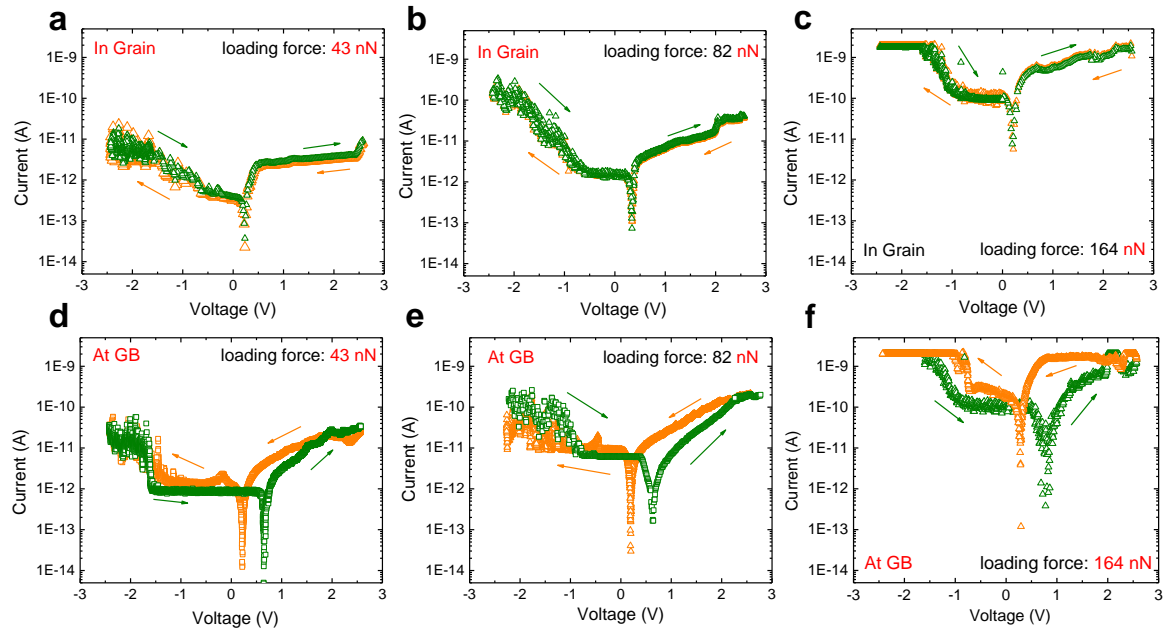

**Supplementary Figure 3:** Local dark-current measured on a grain with applying 43 nN (a), 82 nN (b) and 164 nN (c) loading force on the c-AFM tip, respectively. Local dark-current measured at a grain boundary (GB) with applying 43 nN (d), 82 nN (e) and 164 nN (f) loading force on the c-AFM tip, respectively.

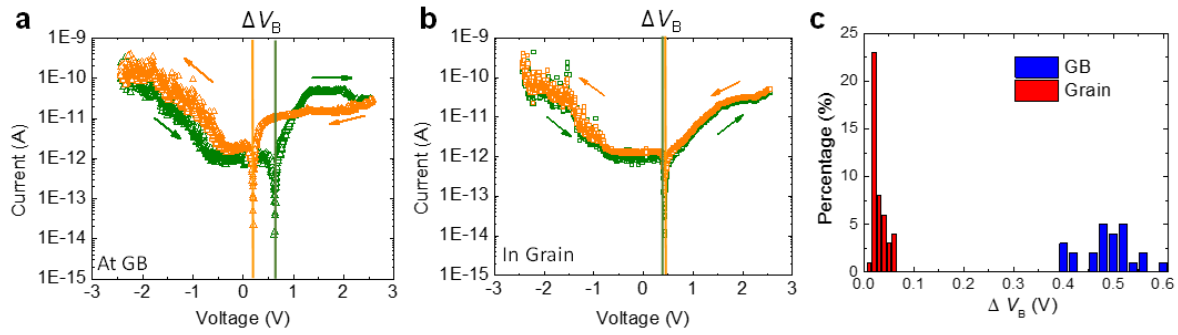

**Supplementary Figure 4:** (a) Dark-current measured at GB showed a large built-in potential difference ( $\Delta V_B$ ) with reverse and forward scanning, as a result of fast ion migration. (b) Dark-current measured in a grain showed negligible built-in potential difference ( $\Delta V_B$ ) with reverse and forward scanning, as a result of slow ion migration. (c) Statistical results demonstrate that the  $\Delta V_B$  difference between GBs and grains is well reproducible.

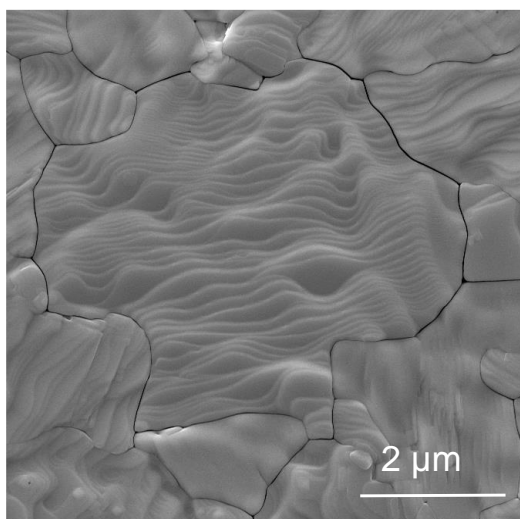

**Supplementary Figure 5: Grains with textured structure in CH<sub>3</sub>NH<sub>3</sub>PbI<sub>3</sub> thin film.**

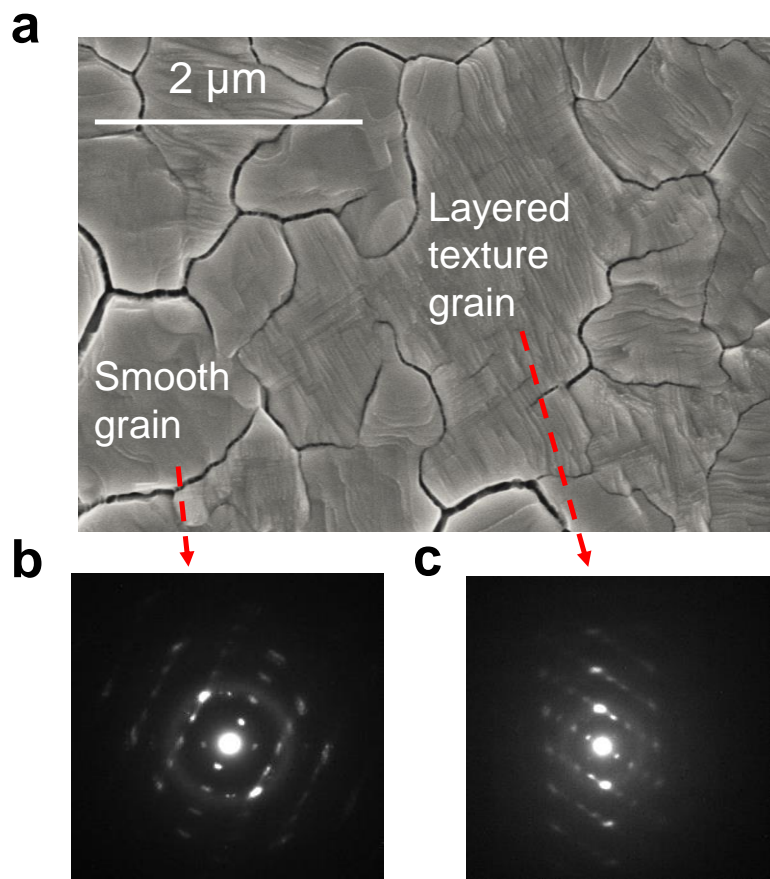

**Supplementary Figure 6:** (a) A SEM image shows grains with different topography. (b) Diffraction pattern of a smooth grain. (c) Diffraction pattern of a textured grain.

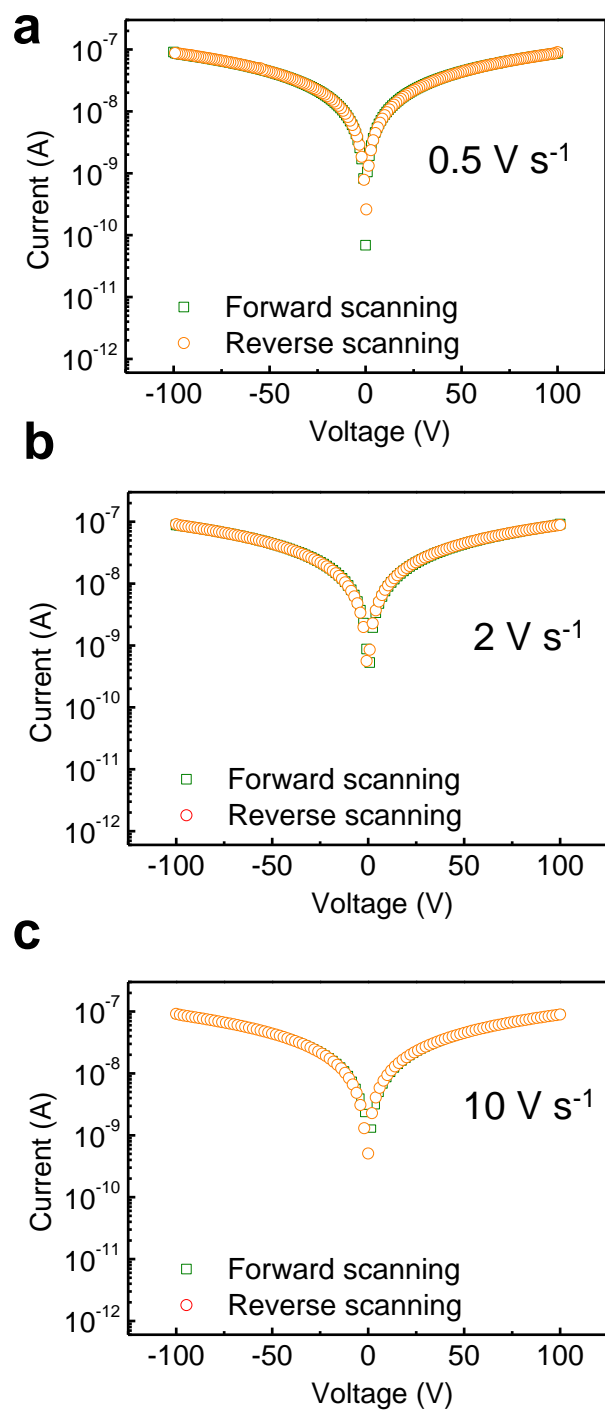

**Supplementary Figure 7: No dark current hysteresis was observed in the  $\text{CH}_3\text{NH}_3\text{PbBr}_3$  single-crystal device regardless of the scanning rate: (a)  $0.5 \text{ V s}^{-1}$ , (b)  $2 \text{ V s}^{-1}$ , (c)  $10 \text{ V s}^{-1}$ .**
